# Supplementary material for: Anti-Inflammatory Drug Therapy in Aneurysmal Subarachnoid Hemorrhage: A Systematic Review and Meta-Analysis of Prospective Randomized and Placebo-Controlled Trials
Source: J Clin Med. 2023 Jun 20;12(12):4165. doi: 10.3390/jcm12124165 (PMC10298889; doi:10.3390/jcm12124165)
Supplement: Supplementary file 1 [file jcm-12-04165-s001.zip › jcm-2394120-supplementary.pdf]

| SUPPLEMENTARY TABLE S1. Characteristics of excluded anti-inflammatory studies |      |                            |                                                                                        |                    |                           |                         |                                                                                   |
|-------------------------------------------------------------------------------|------|----------------------------|----------------------------------------------------------------------------------------|--------------------|---------------------------|-------------------------|-----------------------------------------------------------------------------------|
| Name                                                                          | Year | Blinding                   | Treatment                                                                              | No. patients total | No. patients in treatment | No. patients in control | Cause of exclusion                                                                |
| Chen et al. [39]                                                              | 2020 | Double-blinded             | 20 mg Atorvastatin for up to 14 days                                                   | 300                | 150                       | 150                     | Only elderly patients (60-90 years)                                               |
| Fei et al. [40]                                                               | 2007 | Not stated                 | Intraoperative topical 10 mg dexamethasone                                             | 20                 | 10                        | 10                      | Pilot study, Unknown blinding method No data regarding mortality or mRS follow-up |
| Galea et al. [41]                                                             | 2018 | Single-blinded             | 100 mg Subcutaneous interleukin-1 receptor antagonist                                  | 136                | 68                        | 68                      | Single-blinded                                                                    |
| Hasan et al. [42]                                                             | 1989 | Blinded outcome assessment | Intravenous Fludrocortisone acetate or orally 400 µg/d in two doses for 12 days        | 91                 | 46                        | 45                      | No placebo, No data regarding mortality or mRS follow-up                          |
| Hashi et al. [43]                                                             | 1988 | Double-blinded             | Intravenous Hydrocortisone sodium phosphate (3 g) in intervals of 12 hours for 6 times | 140                | 71                        | 69                      | Written in Japanese                                                               |
| Jaschinski et al. [44]                                                        | 2008 | Not stated                 | 40 mg pravastatin daily                                                                | 98                 | 40                        | 58                      | Abstract only, unknown blinding                                                   |
| Lynch et al. [45]                                                             | 2005 | Double-blinded             | 80 mg Simvastatin daily for 14 days                                                    | 39                 | 19                        | 20                      | No data regarding mortality or mRS follow-up                                      |
| Macedo et al. [46]                                                            | 2009 | Not blinded                | 80 mg simvastatin                                                                      | 21                 | 11                        | 10                      | Abstract only, not blinded                                                        |
| Mori et al. [47]                                                              | 1999 | Not stated                 | Oral Fludrocortisone acetate 0.3 mg/d for 1-8 days                                     | 25                 | 15                        | 10                      | Unknown Blinding method, unknown randomization method, no placebo                 |
| Moro et al. [48]                                                              | 2003 | Not blinded                | 1200 mg Hydrocortisone per day until day 10                                            | 28                 | 14                        | 14                      | Not blinded, no placebo, no data regarding mortality or mRS follow-up             |
| Naraoka et al. [49]                                                           | 2018 | Double-blinded             | 4 mg Pitavastatin daily for 14 days                                                    | 108                | 54                        | 54                      | No data regarding mortality or mRS follow-up                                      |
| Singh et al. [50]                                                             | 2014 | Double-blinded             | Intravenous bolus of IL-1 Receptor Antagonist                                          | 13                 | 6                         | 7                       | No data regarding mortality or mRS follow-up                                      |
| Wong et al. [51]                                                              | 2014 | Double-blinded             | 80 or 40 mg Simvastatin daily for 21 days                                              | 255                | 131 (high dose)           | 124 (low dose)          | No placebo                                                                        |

| <b>SUPPLEMENTARY TABLE S2: Quality assessment of prospective randomized double-blind, and placebo-controlled trials</b> |                     |                                                                                                                                                                        |
|-------------------------------------------------------------------------------------------------------------------------|---------------------|------------------------------------------------------------------------------------------------------------------------------------------------------------------------|
| <b>Chou 2008 [25]</b>                                                                                                   | <b>Risk of bias</b> | <b>Author judgment</b>                                                                                                                                                 |
| Random sequence generation (selection bias)                                                                             | Unclear             | Randomization was performed. Randomization sequence is not described.                                                                                                  |
| Allocation concealment (selection bias)                                                                                 | Unclear             | The allocation concealment is not reported.                                                                                                                            |
| Blinding of participants and personnel (performance bias)                                                               | Low risk            | Double blinded                                                                                                                                                         |
| Blinding of outcome assessment (detection bias)                                                                         | Low risk            | Double blinded                                                                                                                                                         |
| Incomplete outcome data (attrition bias)                                                                                | Low risk            | All outcome data are reported. Intention-to-treat analyses were performed                                                                                              |
| Selective reporting (reporting bias)                                                                                    | Low risk            | All prespecified outcomes were reported.                                                                                                                               |
| Other bias                                                                                                              | Unclear             |                                                                                                                                                                        |
| <b>Diringer 2016 [26]</b>                                                                                               | <b>Risk of bias</b> | <b>Author judgment</b>                                                                                                                                                 |
| Random sequence generation (selection bias)                                                                             | Unclear             | Randomization was performed by a computerized system. Randomization sequence is not described.                                                                         |
| Allocation concealment (selection bias)                                                                                 | Unclear             | The allocation concealment is not reported.                                                                                                                            |
| Blinding of participants and personnel (performance bias)                                                               | Low risk            | Double blinded                                                                                                                                                         |
| Blinding of outcome assessment (detection bias)                                                                         | Low risk            | Double blinded                                                                                                                                                         |
| Incomplete outcome data (attrition bias)                                                                                | Low risk            | All outcome data are reported.                                                                                                                                         |
| Selective reporting (reporting bias)                                                                                    | Low risk            | All prespecified outcomes were reported.                                                                                                                               |
| Other bias                                                                                                              | Unclear             |                                                                                                                                                                        |
| <b>Garcia Pastor 2022 [27]</b>                                                                                          | <b>Risk of bias</b> | <b>Author judgment</b>                                                                                                                                                 |
| Random sequence generation (selection bias)                                                                             | Unclear             | Computer-derived tables were used for randomization. Further information is not given                                                                                  |
| Allocation concealment (selection bias)                                                                                 | Unclear             | Patients were randomly allocated. Detailed allocation concealment not given.                                                                                           |
| Blinding of participants and personnel (performance bias)                                                               | Low risk            | Double blinded                                                                                                                                                         |
| Blinding of outcome assessment (detection bias)                                                                         | Low risk            | Double blinded                                                                                                                                                         |
| Incomplete outcome data (attrition bias)                                                                                | Unclear             | All prespecified endpoints are summarized with the results. Incomplete outcome data of mRS score at 3 months. Reason for lack of data in a few patients not available. |
| Selective reporting (reporting bias)                                                                                    | Low risk            | All prespecified outcomes were reported.                                                                                                                               |
| Other bias                                                                                                              | Unclear             |                                                                                                                                                                        |
| <b>Garg 2013 [28]</b>                                                                                                   | <b>Risk of bias</b> | <b>Author judgment</b>                                                                                                                                                 |
| Random sequence generation (selection bias)                                                                             | Low risk            | Randomization was performed. Patients were randomized by block randomization method with variable block size.                                                          |
| Allocation concealment (selection bias)                                                                                 | Low risk            | Allocation to each group in a 1:1 ratio.                                                                                                                               |
| Blinding of participants and personnel (performance bias)                                                               | Low risk            | Double blinded                                                                                                                                                         |
| Blinding of outcome assessment (detection bias)                                                                         | Low risk            | Double blinded                                                                                                                                                         |
| Incomplete outcome data (attrition bias)                                                                                | Low risk            | All outcome data are reported. Drug discontinuation because of transaminitis in both arms.                                                                             |
| Selective reporting (reporting bias)                                                                                    | Low risk            | All prespecified outcomes were reported.                                                                                                                               |
| Other bias                                                                                                              | Unclear             |                                                                                                                                                                        |

| <b>Gomis 2010 [29]</b>                                    | <b>Risk of bias</b> | <b>Author judgment</b>                                                                                                                                                                                                                                                                                                     |
|-----------------------------------------------------------|---------------------|----------------------------------------------------------------------------------------------------------------------------------------------------------------------------------------------------------------------------------------------------------------------------------------------------------------------------|
| Random sequence generation (selection bias)               | Unclear             | The method of randomization is not reported.                                                                                                                                                                                                                                                                               |
| Allocation concealment (selection bias)                   | Unclear             | The allocation concealment is not reported.                                                                                                                                                                                                                                                                                |
| Blinding of participants and personnel (performance bias) | Low risk            | Double blinded                                                                                                                                                                                                                                                                                                             |
| Blinding of outcome assessment (detection bias)           | Low risk            | Double blinded                                                                                                                                                                                                                                                                                                             |
| Incomplete outcome data (attrition bias)                  | Low risk            | One patient of the experimental arm and three of the placebo arm were regarded as not treatable because of early death by recurrent hemorrhages prior to treatment, early death after first hemorrhage, acute renal failure, acute respiratory failure, and hypoglycemia. Further outcome data are present in all patients |
| Selective reporting (reporting bias)                      | Low risk            | All prespecified outcomes were reported.                                                                                                                                                                                                                                                                                   |
| Other bias                                                | Unclear             |                                                                                                                                                                                                                                                                                                                            |
| <b>Hop 2000 [30]</b>                                      | <b>Risk of bias</b> | <b>Author judgment</b>                                                                                                                                                                                                                                                                                                     |
| Random sequence generation (selection bias)               | Unclear             | The method of randomization is not reported.                                                                                                                                                                                                                                                                               |
| Allocation concealment (selection bias)                   | Unclear             | The allocation concealment is not reported.                                                                                                                                                                                                                                                                                |
| Blinding of participants and personnel (performance bias) | Low risk            | Double blinded                                                                                                                                                                                                                                                                                                             |
| Blinding of outcome assessment (detection bias)           | Low risk            | Double blinded                                                                                                                                                                                                                                                                                                             |
| Incomplete outcome data (attrition bias)                  | Low risk            | All outcome data are reported.                                                                                                                                                                                                                                                                                             |
| Selective reporting (reporting bias)                      | Low risk            | All prespecified outcomes were reported.                                                                                                                                                                                                                                                                                   |
| Other bias                                                | Unclear             |                                                                                                                                                                                                                                                                                                                            |
| <b>Katayama 2007 [31]</b>                                 | <b>Risk of bias</b> | <b>Author judgment</b>                                                                                                                                                                                                                                                                                                     |
| Random sequence generation (selection bias)               | Unclear             | Randomization was performed.<br>Randomization sequence is not reported.                                                                                                                                                                                                                                                    |
| Allocation concealment (selection bias)                   | Unclear             | Allocation concealment is not reported.                                                                                                                                                                                                                                                                                    |
| Blinding of participants and personnel (performance bias) | Low risk            | Double blinded                                                                                                                                                                                                                                                                                                             |
| Blinding of outcome assessment (detection bias)           | Low risk            | Double blinded                                                                                                                                                                                                                                                                                                             |
| Incomplete outcome data (attrition bias)                  | Low risk            | All outcome data are reported.                                                                                                                                                                                                                                                                                             |
| Selective reporting (reporting bias)                      | Low risk            | All prespecified outcomes were reported.                                                                                                                                                                                                                                                                                   |
| Other bias                                                | Unclear             |                                                                                                                                                                                                                                                                                                                            |
| <b>Kirkpatrick 2014 [32]</b>                              | <b>Risk of bias</b> | <b>Author judgment</b>                                                                                                                                                                                                                                                                                                     |
| Random sequence generation (selection bias)               | Low risk            | Randomization was performed.<br>Randomization sequence was generated by a computer to randomize patients by blocks of ten patients (5 experiment, 5 placebo).                                                                                                                                                              |
| Allocation concealment (selection bias)                   | Low risk            | Allocation to each group in a 1:1 ratio.                                                                                                                                                                                                                                                                                   |
| Blinding of participants and personnel (performance bias) | Low risk            | Double blinded                                                                                                                                                                                                                                                                                                             |
| Blinding of outcome assessment (detection bias)           | Low risk            | Double blinded                                                                                                                                                                                                                                                                                                             |
| Incomplete outcome data (attrition bias)                  | Low risk            | All outcome data are reported. Lack of data and exclusion of patients are explained. In both arms patients withdrew, were not adherent to drug protocol, and were lost to                                                                                                                                                  |

|                                                           |                     |                                                                                                                                                                                     |
|-----------------------------------------------------------|---------------------|-------------------------------------------------------------------------------------------------------------------------------------------------------------------------------------|
|                                                           |                     | follow-up. Intention-to-treat analyses were performed                                                                                                                               |
| Selective reporting (reporting bias)                      | Low risk            | All prespecified outcomes were reported.                                                                                                                                            |
| Other bias                                                | Unclear             |                                                                                                                                                                                     |
| <b>Martini 2022 [33]</b>                                  | <b>Risk of bias</b> | <b>Author judgment</b>                                                                                                                                                              |
| Random sequence generation (selection bias)               | Low risk            | The method of randomization is reported. Computer-derived random sequence based on an unrestricted “fair-coin” randomization procedure was provided by an independent statistician. |
| Allocation concealment (selection bias)                   | Low risk            | Allocation to each group in a 1:1 ratio.                                                                                                                                            |
| Blinding of participants and personnel (performance bias) | Low risk            | Double blinded                                                                                                                                                                      |
| Blinding of outcome assessment (detection bias)           | Low risk            | Double blinded                                                                                                                                                                      |
| Incomplete outcome data (attrition bias)                  | Low risk            | One patient of the placebo group withdrew consent prior to receiving the first dose. Further outcome data are present.                                                              |
| Selective reporting (reporting bias)                      | Low risk            | All prespecified outcomes were reported.                                                                                                                                            |
| Other bias                                                | Unclear             |                                                                                                                                                                                     |
| <b>Suzuki 1989 [34]</b>                                   | <b>Risk of bias</b> | <b>Author judgment</b>                                                                                                                                                              |
| Random sequence generation (selection bias)               | Unclear             | Randomization was performed. Randomization sequence is not reported.                                                                                                                |
| Allocation concealment (selection bias)                   | Unclear             | Allocation concealment is not reported.                                                                                                                                             |
| Blinding of participants and personnel (performance bias) | Low risk            | Double blinded                                                                                                                                                                      |
| Blinding of outcome assessment (detection bias)           | Low risk            | Double blinded                                                                                                                                                                      |
| Incomplete outcome data (attrition bias)                  | Low risk            | All outcome data are reported.                                                                                                                                                      |
| Selective reporting (reporting bias)                      | Low risk            | All prespecified outcomes were reported.                                                                                                                                            |
| Other bias                                                | Unclear             |                                                                                                                                                                                     |
| <b>Tseng 2005 [35]</b>                                    | <b>Risk of bias</b> | <b>Author judgment</b>                                                                                                                                                              |
| Random sequence generation (selection bias)               | Low risk            | Simple randomization was used                                                                                                                                                       |
| Allocation concealment (selection bias)                   | Unclear             | The allocation concealment is not reported.                                                                                                                                         |
| Blinding of participants and personnel (performance bias) | Low risk            | Double blinded                                                                                                                                                                      |
| Blinding of outcome assessment (detection bias)           | Low risk            | Double blinded                                                                                                                                                                      |
| Incomplete outcome data (attrition bias)                  | Low risk            | All outcome data are reported.                                                                                                                                                      |
| Selective reporting (reporting bias)                      | Low risk            | All prespecified outcomes were reported.                                                                                                                                            |
| Other bias                                                | Unclear             |                                                                                                                                                                                     |
| <b>Van den Bergh 2006 [36]</b>                            | <b>Risk of bias</b> | <b>Author judgment</b>                                                                                                                                                              |
| Random sequence generation (selection bias)               | Low-risk            | The method of randomization is reported. Factorial design was used                                                                                                                  |
| Allocation concealment (selection bias)                   | Low-risk            | Allocation to each group in a 1:1 ratio.                                                                                                                                            |
| Blinding of participants and personnel (performance bias) | Low-risk            | Double blinded                                                                                                                                                                      |
| Blinding of outcome assessment (detection bias)           | Low-risk            | Double blinded                                                                                                                                                                      |
| Incomplete outcome data (attrition bias)                  | Low risk            | Discontinued intervention in both arms because of adverse events. Intention-to-treat analysis was performed                                                                         |
| Selective reporting (reporting bias)                      | Low risk            | All prespecified outcomes were reported                                                                                                                                             |
| Other bias                                                | Unclear             |                                                                                                                                                                                     |
| <b>Vergouwen 2009 [37]</b>                                | <b>Risk of bias</b> | <b>Author judgment</b>                                                                                                                                                              |

|                                                           |                     |                                                                                                                                                                                         |
|-----------------------------------------------------------|---------------------|-----------------------------------------------------------------------------------------------------------------------------------------------------------------------------------------|
| Random sequence generation (selection bias)               | Low risk            | Randomization was performed. Permuted-block randomization was used.                                                                                                                     |
| Allocation concealment (selection bias)                   | Low risk            | Allocation to each group in a 1:1 ratio.                                                                                                                                                |
| Blinding of participants and personnel (performance bias) | Low risk            | Double blinded                                                                                                                                                                          |
| Blinding of outcome assessment (detection bias)           | Low risk            | Double blinded                                                                                                                                                                          |
| Incomplete outcome data (attrition bias)                  | Low risk            | All outcome data are reported except for those patients with a discontinued intervention because of adverse events or study medication lost. Intention-to-treat analyses were performed |
| Selective reporting (reporting bias)                      | Low risk            | All prespecified outcomes were reported.                                                                                                                                                |
| Other bias                                                | Unclear             |                                                                                                                                                                                         |
| <b>Woo 2020 [38]</b>                                      | <b>Risk of bias</b> | <b>Author judgment</b>                                                                                                                                                                  |
| Random sequence generation (selection bias)               | Low risk            | Randomization was performed. Randomization sequence was generated by SPSS with a block size of ten patients.                                                                            |
| Allocation concealment (selection bias)                   | Low risk            | Allocation to each group in a 1:1 ratio.                                                                                                                                                |
| Blinding of participants and personnel (performance bias) | Low risk            | Double blinded                                                                                                                                                                          |
| Blinding of outcome assessment (detection bias)           | Low risk            | Double blinded                                                                                                                                                                          |
| Incomplete outcome data (attrition bias)                  | Low risk            | All outcome data are reported. Analyses were performed on a modified intention-to-treat basis.                                                                                          |
| Selective reporting (reporting bias)                      | Low risk            | All prespecified outcomes were reported.                                                                                                                                                |
| Other bias                                                | Unclear             |                                                                                                                                                                                         |

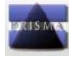

## PRISMA 2020 Checklist

| Section and Topic    | Item # | Checklist item                                                                                                                                                                                                                                                                                                                                                                                                                                                                                                                                                                                                                                                                                                                                                                                                                                                                                                                                                                                                                                                                                                                                                                                                                                                                                                                                                                                                                                                                                                                                                                                                                                                                                                    | Location where item is reported |
|----------------------|--------|-------------------------------------------------------------------------------------------------------------------------------------------------------------------------------------------------------------------------------------------------------------------------------------------------------------------------------------------------------------------------------------------------------------------------------------------------------------------------------------------------------------------------------------------------------------------------------------------------------------------------------------------------------------------------------------------------------------------------------------------------------------------------------------------------------------------------------------------------------------------------------------------------------------------------------------------------------------------------------------------------------------------------------------------------------------------------------------------------------------------------------------------------------------------------------------------------------------------------------------------------------------------------------------------------------------------------------------------------------------------------------------------------------------------------------------------------------------------------------------------------------------------------------------------------------------------------------------------------------------------------------------------------------------------------------------------------------------------|---------------------------------|
| <b>TITLE</b>         |        |                                                                                                                                                                                                                                                                                                                                                                                                                                                                                                                                                                                                                                                                                                                                                                                                                                                                                                                                                                                                                                                                                                                                                                                                                                                                                                                                                                                                                                                                                                                                                                                                                                                                                                                   |                                 |
| Title                | 1      | Anti-inflammatory drug therapy in aneurysmal subarachnoid hemorrhage: A systematic review and meta-analysis of prospective randomized and placebo-controlled trials                                                                                                                                                                                                                                                                                                                                                                                                                                                                                                                                                                                                                                                                                                                                                                                                                                                                                                                                                                                                                                                                                                                                                                                                                                                                                                                                                                                                                                                                                                                                               | Title                           |
| <b>ABSTRACT</b>      |        |                                                                                                                                                                                                                                                                                                                                                                                                                                                                                                                                                                                                                                                                                                                                                                                                                                                                                                                                                                                                                                                                                                                                                                                                                                                                                                                                                                                                                                                                                                                                                                                                                                                                                                                   |                                 |
| Abstract             | 2      | Emerging evidence suggests a potential role of neuroinflammation in aneurysmal subarachnoid hemorrhage (aSAH). We aim to investigate the impact of anti-inflammatory therapy on survival and outcome in aSAH. Eligible randomized placebo-controlled prospective trials (RCT) were searched in PubMed in February 2023. After the available studies following inclusion and exclusion criteria were screened, the main outcome measures were strictly extracted.                                                                                                                                                                                                                                                                                                                                                                                                                                                                                                                                                                                                                                                                                                                                                                                                                                                                                                                                                                                                                                                                                                                                                                                                                                                  | Abstract                        |
| <b>INTRODUCTION</b>  |        |                                                                                                                                                                                                                                                                                                                                                                                                                                                                                                                                                                                                                                                                                                                                                                                                                                                                                                                                                                                                                                                                                                                                                                                                                                                                                                                                                                                                                                                                                                                                                                                                                                                                                                                   |                                 |
| Rationale            | 3      | Delayed cerebral ischemia (DCI) is associated with cerebral vasospasm (CVS) and is suggested to be related to the poor outcome after aSAH. To improve outcome, rescue therapies including selective intraarterial infusion of vasodilators, balloon angioplasty, as well as induced hypertension are used. However, the underlying pathophysiological mechanism enabling the injury expansion following aSAH is still not completely understood. Hence, there is still a limited number of potential proven effective pharmacological drug therapy options. Emerging evidence suggests neuroinflammation as a main avenue of injury expansion and neurological deficits. The peripheral immune cells are recruited into the brain parenchyma and their activated forms release inflammatory cytokines. Vessels being affected by cerebral vasospasm have been found to have an elevated leukocyte adhesion capacity which results in delayed neurologic deterioration.                                                                                                                                                                                                                                                                                                                                                                                                                                                                                                                                                                                                                                                                                                                                            | Introduction                    |
| Objectives           | 4      | In the present meta-analysis, we aim to investigate the existing evidence and identify effective drug interventions that might improve functional outcome and survival rates in patients with aSAH.                                                                                                                                                                                                                                                                                                                                                                                                                                                                                                                                                                                                                                                                                                                                                                                                                                                                                                                                                                                                                                                                                                                                                                                                                                                                                                                                                                                                                                                                                                               | Introduction                    |
| <b>METHODS</b>       |        |                                                                                                                                                                                                                                                                                                                                                                                                                                                                                                                                                                                                                                                                                                                                                                                                                                                                                                                                                                                                                                                                                                                                                                                                                                                                                                                                                                                                                                                                                                                                                                                                                                                                                                                   |                                 |
| Eligibility criteria | 5      | The authors conducted a systematic search of the Pubmed database ( <a href="http://www.ncbi.nlm.nih.gov/pubmed">http://www.ncbi.nlm.nih.gov/pubmed</a> ) in July 2022 for the terms “aneurysmal subarachnoid hemorrhage”, “SAH”, and “subarachnoid hemorrhage”. The search was limited to “randomized controlled trials”, “human studies” and “English”. The articles were screened for randomized placebo, controlled trials investigating anti-inflammatory drug therapies. The literature search included all results until 30 June 2022. Inclusion criteria were formulated according to the PICOS (population, intervention, comparator, outcomes and study design) framework [19]. These criteria were defined as follows: patients suffered from an aSAH; anti-inflammatory drug therapies were conducted; results were compared to a placebo arm; all results of the prespecified endpoints were reported; and the trials were defined as prospective, randomized, placebo-controlled, and double-blinded studies. The following types of results were excluded: reviews, letters, study protocols, conference abstracts, unpublished manuscripts, animal experiments, and studies with insufficient data (e.g., randomized controlled trials without a placebo arm). Furthermore, previous meta-analyses and reviews were searched for studies matching our inclusion and exclusion criteria. The identified articles were evaluated for relevance in a step-wise workflow: First the study titles were screened, then the corresponding abstract and in case of further uncertainty the full-text was screened by two authors (JW and EG) until all retrieved studies were either included or excluded. | Methods                         |
| Information sources  | 6      | The authors conducted a systematic search of the Pubmed database ( <a href="http://www.ncbi.nlm.nih.gov/pubmed">http://www.ncbi.nlm.nih.gov/pubmed</a> ) in July 2022 for the terms “aneurysmal subarachnoid hemorrhage”, “SAH”, and “subarachnoid hemorrhage”.                                                                                                                                                                                                                                                                                                                                                                                                                                                                                                                                                                                                                                                                                                                                                                                                                                                                                                                                                                                                                                                                                                                                                                                                                                                                                                                                                                                                                                                   | Methods                         |
| Search strategy      | 7      | The search was limited to “randomized controlled trials”, “human studies” and “English”. The articles were screened for randomized placebo,                                                                                                                                                                                                                                                                                                                                                                                                                                                                                                                                                                                                                                                                                                                                                                                                                                                                                                                                                                                                                                                                                                                                                                                                                                                                                                                                                                                                                                                                                                                                                                       | Methods                         |

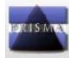

## PRISMA 2020 Checklist

| Section and Topic             | Item # | Checklist item                                                                                                                                                                                                                                                                                                                                                                                                                                                                                                                                                                                                                                                                                                                                                                                                                                                                                                                                                                                                                                                                                                                                                                                                                                                                                                                                                                                                                                                                 | Location where item is reported |
|-------------------------------|--------|--------------------------------------------------------------------------------------------------------------------------------------------------------------------------------------------------------------------------------------------------------------------------------------------------------------------------------------------------------------------------------------------------------------------------------------------------------------------------------------------------------------------------------------------------------------------------------------------------------------------------------------------------------------------------------------------------------------------------------------------------------------------------------------------------------------------------------------------------------------------------------------------------------------------------------------------------------------------------------------------------------------------------------------------------------------------------------------------------------------------------------------------------------------------------------------------------------------------------------------------------------------------------------------------------------------------------------------------------------------------------------------------------------------------------------------------------------------------------------|---------------------------------|
|                               |        | controlled trials investigating anti-inflammatory drug therapies. The literature search included all results until 31 March 2023.                                                                                                                                                                                                                                                                                                                                                                                                                                                                                                                                                                                                                                                                                                                                                                                                                                                                                                                                                                                                                                                                                                                                                                                                                                                                                                                                              |                                 |
| Selection process             | 8      | We performed title screening, abstract screening and in case of uncertainty a whole text screening to search for the eligible studies.                                                                                                                                                                                                                                                                                                                                                                                                                                                                                                                                                                                                                                                                                                                                                                                                                                                                                                                                                                                                                                                                                                                                                                                                                                                                                                                                         | Methods                         |
| Data collection process       | 9      | The data collection was performed by two authors independently (MV, JW). First the study titles were screened, then the corresponding abstract and in case of further uncertainty the full-text was screened by two authors (JW and EG) until all retrieved studies were either included or excluded.                                                                                                                                                                                                                                                                                                                                                                                                                                                                                                                                                                                                                                                                                                                                                                                                                                                                                                                                                                                                                                                                                                                                                                          | Methods                         |
| Data items                    | 10a    | We analyzed the studies to conduct a meta-analysis according to the following outcomes:<br>1) In case of administration of anti-inflammatory drugs, following outcomes were analyzed: Mortality, Outcome                                                                                                                                                                                                                                                                                                                                                                                                                                                                                                                                                                                                                                                                                                                                                                                                                                                                                                                                                                                                                                                                                                                                                                                                                                                                       | Methods                         |
|                               | 10b    | Mortality was assessed according to provided data as patients, who deceased in the course of the therapy<br>We defined general outcome according to modified Ranking scale (mRS) and dichotomized into good (mRS 0-2) and poor (mRS 3-5)                                                                                                                                                                                                                                                                                                                                                                                                                                                                                                                                                                                                                                                                                                                                                                                                                                                                                                                                                                                                                                                                                                                                                                                                                                       | Methods                         |
| Study risk of bias assessment | 11     | The Cochrane Bias Risk Tool was used to analyze the risk of bias (ROB) in the included studies using the software Review Manager Web (RevMan Web Version 5.4.1 from The Cochrane Collaboration, available at <a href="http://revman.cochrane.org">revman.cochrane.org</a> (accessed on 21 December 2022)). The following six characteristics regarding risk of bias assessment were included in the analysis: selection bias, performance bias, detection bias, attrition bias, reporting bias, and other sources of bias. Afterwards, a risk of bias summary chart and plot were created. Two reviewers screened the records independently.                                                                                                                                                                                                                                                                                                                                                                                                                                                                                                                                                                                                                                                                                                                                                                                                                                   | Methods                         |
| Effect measures               | 12     | We measured and reported outcomes in Forest-plots, providing heterogeneity and inconsistency analysis, pooled odds ratios and statistical significance                                                                                                                                                                                                                                                                                                                                                                                                                                                                                                                                                                                                                                                                                                                                                                                                                                                                                                                                                                                                                                                                                                                                                                                                                                                                                                                         | Methods                         |
| Synthesis methods             | 13a    | To see all the eligible studies and reported outcomes, see Table 1                                                                                                                                                                                                                                                                                                                                                                                                                                                                                                                                                                                                                                                                                                                                                                                                                                                                                                                                                                                                                                                                                                                                                                                                                                                                                                                                                                                                             | Methods                         |
|                               | 13b    | To see all the eligible studies and reported outcomes, see Table 1                                                                                                                                                                                                                                                                                                                                                                                                                                                                                                                                                                                                                                                                                                                                                                                                                                                                                                                                                                                                                                                                                                                                                                                                                                                                                                                                                                                                             | Methods                         |
|                               | 13c    | For visualization of our meta-analysis, Forest Plots were created with Review Manager Web (RevMan Web Version 5.4.1 from the Cochrane Collaboration, available at <a href="http://revman.cochrane.org">revman.cochrane.org</a> ) were presented as figures to selected outcomes                                                                                                                                                                                                                                                                                                                                                                                                                                                                                                                                                                                                                                                                                                                                                                                                                                                                                                                                                                                                                                                                                                                                                                                                | Methods                         |
|                               | 13d    | Review Manager Web (RevMan Web Version 5.4.1 from The Cochrane Collaboration) was used to conduct the meta-analyses. To analyze the statistical heterogeneity and inconsistency, $\chi^2$ and $I^2$ statistics were used, respectively; an $I^2$ value of 50% or more represented substantial heterogeneity. Weight of the relative contribution of the individual trials, based on study sample size, was considered regarding the treatment effect estimation. Data from a multi-arm trial with different dosage regimens were extracted by combining those groups for the inclusion in the pairwise meta-analysis [21]. Publication bias of the included studies regarding both defined endpoints (survival & neurological outcome) was assessed using three different methods: (1) Funnel plots were created to visually investigate the publication bias of the included trials; (2) An Egger regression was performed to statistically evaluate the symmetry of the funnel plot. The likelihood of publication bias was determined using the Egger regression intercept two-tailed test and the threshold of the significance value was set at 5% [22,]. (3) Begg's test was used for the evaluation of the data symmetry [23]. Egger's and Begg's tests were performed using MedCalc (Version 20.123 for Windows). Effect sizes were expressed as pooled odds ratio (OR) estimates using a random effect model. Analyses for both death and poor outcome were performed | Methods                         |
|                               | 13e    | In case of subgroup-analysis, there might be a heterogeneity of the data caused by lack of published results                                                                                                                                                                                                                                                                                                                                                                                                                                                                                                                                                                                                                                                                                                                                                                                                                                                                                                                                                                                                                                                                                                                                                                                                                                                                                                                                                                   | Methods                         |
|                               | 13f    | Not available                                                                                                                                                                                                                                                                                                                                                                                                                                                                                                                                                                                                                                                                                                                                                                                                                                                                                                                                                                                                                                                                                                                                                                                                                                                                                                                                                                                                                                                                  | Methods                         |



## PRISMA 2020 Checklist

| Section and Topic             | Item # | Checklist item                                                                                                                                                                                         | Location where item is reported |
|-------------------------------|--------|--------------------------------------------------------------------------------------------------------------------------------------------------------------------------------------------------------|---------------------------------|
| Reporting bias assessment     | 14     | According to our strict inclusion criteria and high quality of included studies, we do not suppose to have bias due to missing results. Risk of bias assessment was performed for all included studies | Methods                         |
| Certainty assessment          | 15     | Quality assessment was performed and the risk of bias assessment is summarized in supplementary table S2.                                                                                              | Methods                         |
| <b>RESULTS</b>                |        |                                                                                                                                                                                                        |                                 |
| Study selection               | 16a    | Process of the search and selection is summarized in Figure 1.                                                                                                                                         | Figure 1                        |
|                               | 16b    | Excluded studies are summarized in supplementary Table S1                                                                                                                                              | Table S1                        |
| Study characteristics         | 17     | Included studies are summarized in table 1.                                                                                                                                                            | Table 1                         |
| Risk of bias in studies       | 18     | Risk of bias analysis is reported in supplementary table 2 and Figure 2                                                                                                                                | Table S2 & Figure 2             |
| Results of individual studies | 19     | Analysis of each outcome is separately reported on with it's own forest plot                                                                                                                           | Figures 2-4                     |
| Results of syntheses          | 20a    | Risk of bias assessment is summarized in the Figure 2. Figure 4 represent funnel plots visualizing the publication bias                                                                                | Figure 2 & 4                    |
|                               | 20b    | Results of the statistical syntheses are summarized in the sections 3.4-3.6                                                                                                                            | Results 3.4-3.6                 |
|                               | 20c    | Results regarding heterogeneity are presented in the sections 3.4-3.6                                                                                                                                  | Results 3.4-3.6                 |
|                               | 20d    | Presented                                                                                                                                                                                              | Results 3.4-3.6                 |
| Reporting biases              | 21     | Risk of bias assessment is shown in section 3.3                                                                                                                                                        | Results 3.3                     |
| Certainty of evidence         | 22     | Not available                                                                                                                                                                                          | NA                              |
| <b>DISCUSSION</b>             |        |                                                                                                                                                                                                        |                                 |
| Discussion                    | 23a    | Provide a general interpretation of the results in the context of other evidence.<br>Presented                                                                                                         | Discussion                      |
|                               | 23b    | Discuss any limitations of the evidence included in the review.<br>Presented                                                                                                                           | Discussion, last paragraph      |
|                               | 23c    | Discuss any limitations of the review processes used.<br>Presented                                                                                                                                     | Discussion                      |
|                               | 23d    | Discuss implications of the results for practice, policy, and future research.                                                                                                                         | Discussion                      |

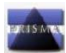

## PRISMA 2020 Checklist

| Section and Topic                              | Item # | Checklist item                                                                                                                                                       | Location where item is reported |
|------------------------------------------------|--------|----------------------------------------------------------------------------------------------------------------------------------------------------------------------|---------------------------------|
|                                                |        | Presented                                                                                                                                                            |                                 |
| OTHER INFORMATION                              |        |                                                                                                                                                                      |                                 |
| Registration and protocol                      | 24a    | The study was registered in the “International Prospective Register of Systematic Reviews” (PROSPERO) in 2023 (CRD42023395375)                                       |                                 |
|                                                | 24b    | The study was registered in the “International Prospective Register of Systematic Reviews” (PROSPERO) in 2023 (CRD42023395375)                                       |                                 |
|                                                | 24c    | No amendments to describe                                                                                                                                            |                                 |
| Support                                        | 25     | There is no financial conflict of interest to declare                                                                                                                |                                 |
| Competing interests                            | 26     | No competing interests of the authors to declare                                                                                                                     |                                 |
| Availability of data, code and other materials | 27     | Template data collection form, data extracted and used for the analysis are reported in the section “methods”. The softwares Revman and Medcalc are available online |                                 |

From: Page MJ, McKenzie JE, Bossuyt PM, Boutron I, Hoffmann TC, Mulrow CD, et al. The PRISMA 2020 statement: an updated guideline for reporting systematic reviews. *BMJ* 2021;372:n71. doi: 10.1136/bmj.n71

For more information, visit: <http://www.prisma-statement.org/>

**Figure S1.** PRISMA checklist summarizing the checklist items and the location of the items in the present meta-analysis.

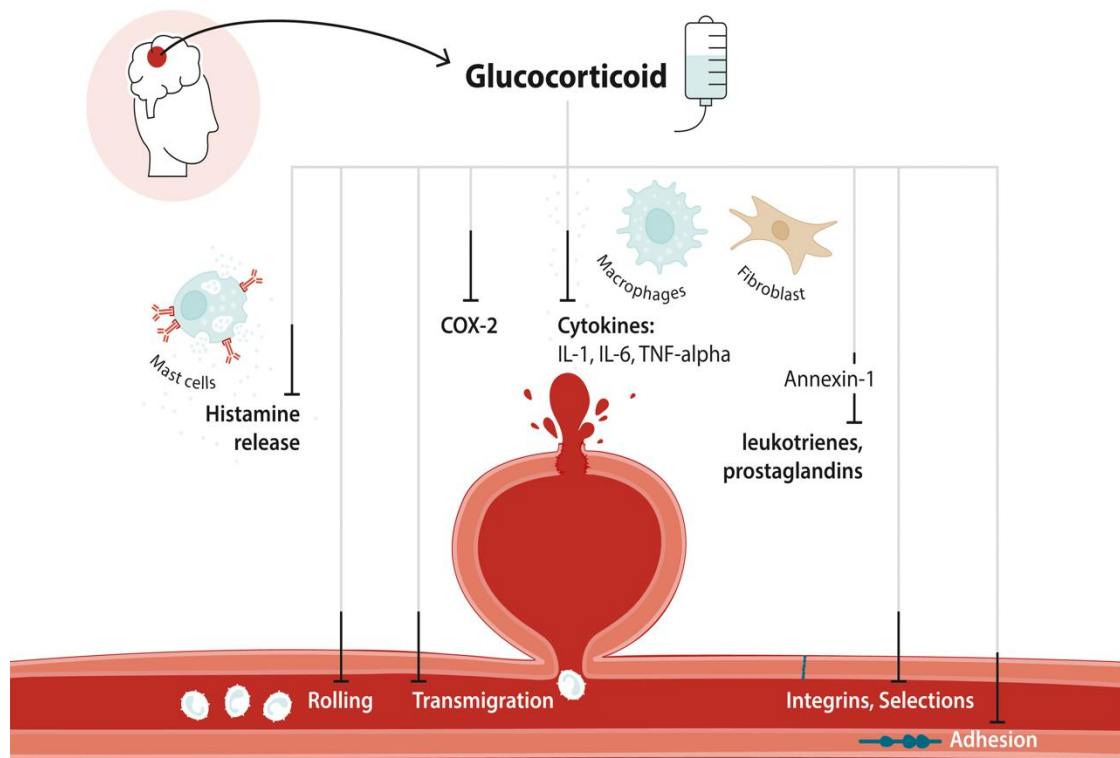

**Figure S2.** Illustrative summary of the potential anti-inflammatory functioning and avenues influenced by corticosteroid therapy in aneurysmal subarachnoid hemorrhage.
